# Supplementary material for: Hypomodified tRNA in evolutionarily distant yeasts can trigger rapid tRNA decay to activate the general amino acid control response, but with different consequences
Source: PubMed Central journal article supplement (PMC7473580; doi:10.1371/journal.pgen.1008893), 2020-08-25

A.

*Sp trm8Δ*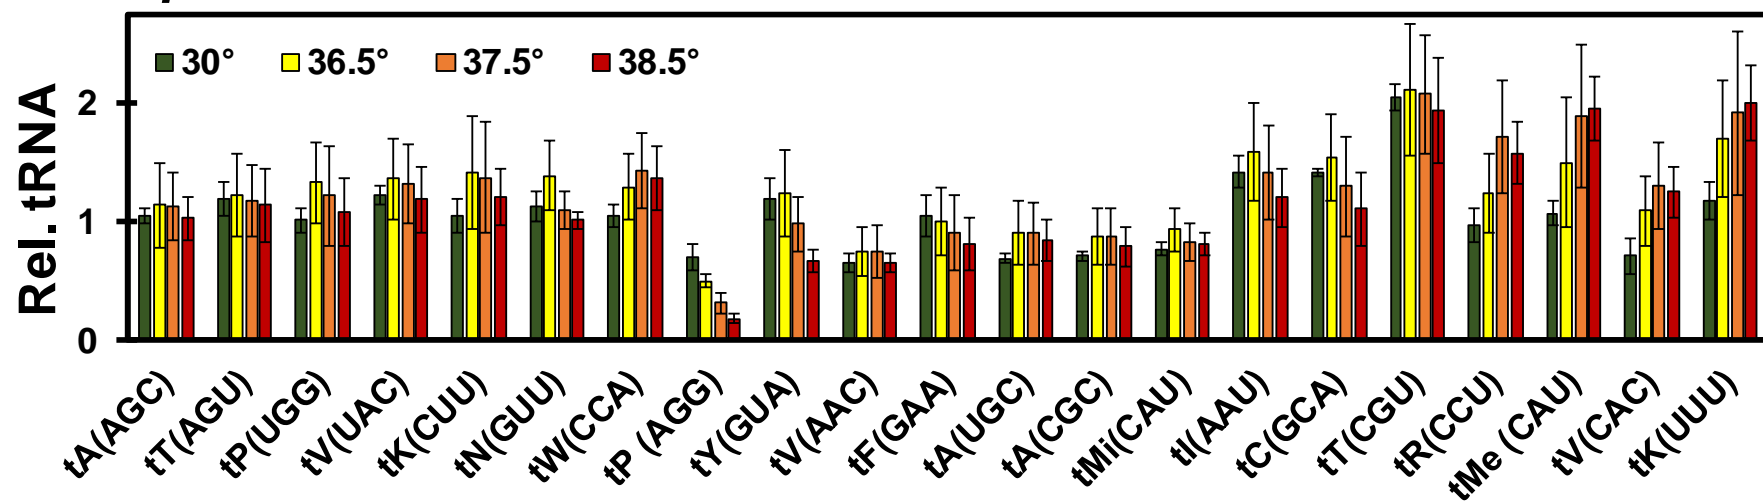

B.

WT

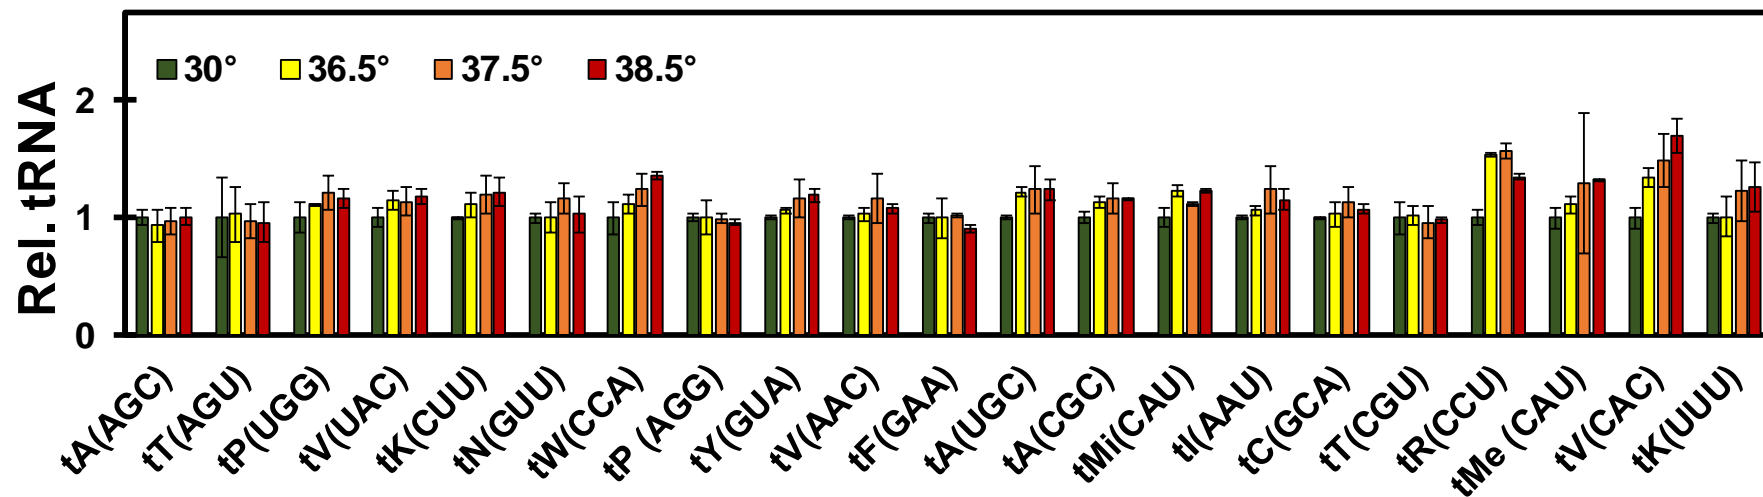

Supplement: pgen.1008893.s005.pdf [file pgen.1008893.s005.pdf]
