# Supplementary material for: Hypomodified tRNA in evolutionarily distant yeasts can trigger rapid tRNA decay to activate the general amino acid control response, but with different consequences
Source: PubMed Central journal article supplement (PMC7473580; doi:10.1371/journal.pgen.1008893), 2020-08-25
Supplement: pgen.1008893.s024.pdf [file pgen.1008893.s024.pdf]

**S1 Table. Variable loop sequences and the folding free energies of the acceptor stem/Tstem loop of predicted Trm8 substrate tRNAs of *S. pombe trm8Δ* mutants**

| tRNA      | Variable loop sequence | $\Delta G^{\circ}_{37}$ (Kcal/mole)<br>Acceptor/T stem loop |
|-----------|------------------------|-------------------------------------------------------------|
| tC(GCA-1) | AGGUC                  | -16.0                                                       |
| tF(GAA-1) | UGGUC                  | -16.8                                                       |
| tT(CGU)   | AGGUC                  | -16.8                                                       |
| tT(AGU)   | AGGCC                  | -16.9                                                       |
| tK(UUU)   | AGGUU                  | -17.0                                                       |
| tP (AGG)  | UGGUC                  | -17.7                                                       |
| tA(AGC)   | AGGUC                  | -17.7                                                       |
| tR(CCU)   | AGGUU                  | -18.2                                                       |
| tC(GCA-2) | AGGUC                  | -18.3                                                       |
| tF(GAA-2) | UGGUC                  | -18.5                                                       |
| tV(AAC)   | CGGUC                  | -19.9                                                       |
| tMe (CAU) | AGGUU                  | -20.2                                                       |
| tY(GUA)   | UGGUC                  | -20.5                                                       |
| tP(UGG-1) | UGGUC                  | -20.6                                                       |
| tW(CCA)   | AAGUC                  | -20.7                                                       |
| tV(UAC)   | CGGUC                  | -20.9                                                       |
| tA(UGC)   | UCGUC                  | -22.0                                                       |
| tK(CUU)   | AGGUU                  | -22.2                                                       |
| tP(UGG-1) | UGGUC                  | -23.7                                                       |
| tI(AAU)   | AUGUC                  | -24.0                                                       |
| tA(CGC)   | AGGUC                  | -24.2                                                       |
| tN(GUU)   | AGGUC                  | -25.2                                                       |
| tMi(CAU)  | AGGUU                  | -25.5                                                       |
| tV(CAC)   | AGGUC                  | -25.5                                                       |
