# Supplementary material for: Hypomodified tRNA in evolutionarily distant yeasts can trigger rapid tRNA decay to activate the general amino acid control response, but with different consequences
Source: PubMed Central journal article supplement (PMC7473580; doi:10.1371/journal.pgen.1008893), 2020-08-25
Supplement: pgen.1008893.s025.pdf [file pgen.1008893.s025.pdf]

**S2 Table. GAAC mutations identified in *S. pombe trm8Δ* suppressors**

| Strain                  | Mutation                        |
|-------------------------|---------------------------------|
| <i>Sp trm8 gcn1-1</i>   | Inframe deletion in V2193-A2195 |
| <i>Sp trm8 gcn2-1</i>   | Start lost, G3A                 |
| <i>Sp trm8 gcn2-2</i>   | Frameshift at R71               |
| <i>Sp trm8 gcn2-3</i>   | Stop at W982                    |
| <i>Sp trm8 tif221-1</i> | Stop at Q257                    |
| <i>Sp trm8 tif221-2</i> | Frameshift at L43               |
