# Supplementary material for: Hypomodified tRNA in evolutionarily distant yeasts can trigger rapid tRNA decay to activate the general amino acid control response, but with different consequences
Source: PubMed Central journal article supplement (PMC7473580; doi:10.1371/journal.pgen.1008893), 2020-08-25
Supplement: pgen.1008893.s026.pdf [file pgen.1008893.s026.pdf]

**S3 Table. *S. cerevisiae* strains used in this study**

| Strain name | Parent strain | Genotype                                       | Source     |
|-------------|---------------|------------------------------------------------|------------|
| YTD 386     | AA 527        | <i>trm8Δ::natMX trm4Δ::kanMX</i>               | [1]        |
| YTD 558     | YTD 386       | <i>trm8Δ::natMX trm4Δ::BleMX</i>               | This study |
| YTD 559     | YTD 558       | <i>trm8Δ::natMX trm4Δ::BleMX gcn2Δ::KanMX</i>  | This study |
| YTD 561     | YTD 566       | <i>gcn2Δ::KanMX</i>                            | This study |
| YTD 562     | AA 413        | <i>trm8Δ::NatMX</i>                            | This study |
| YTD 563     | YLN 5         | <i>trm1Δ::BleMX</i>                            | This study |
| YTD 564     | ISC 188       | <i>tan1Δ::KanMX</i>                            | This study |
| YTD 565     | ISC 834       | <i>tan1Δ::KanMX trm44Δ::natMX</i>              | [2]        |
| YTD 566     | ISC 534       | WT MATa                                        | This study |
| YTD 567     | YTD 558       | <i>trm8Δ::natMX trm4Δ::BleMX gcn1Δ::KanMX</i>  | This study |
| YTD 568     | YTD 558       | <i>trm8Δ::natMX trm4Δ::BleMX gcn4Δ::KanMX</i>  | This study |
| YTD 569     | YTD 562       | <i>trm8Δ::NatMX gcn2Δ::KanMX</i>               | This study |
| YTD 570     | YTD 563       | <i>trm1Δ::NatMX gcn2Δ::KanMX</i>               | This study |
| YTD 571     | YTD 564       | <i>tan1Δ::BleMX</i>                            | This study |
| YTD 572     | YTD 565       | <i>tan1Δ::BleMX trm44Δ::natMX</i>              | This study |
| YTD 573     | YTD 566       | <i>gcn1Δ::KanMX</i>                            | This study |
| YTD 574     | YTD 566       | <i>gcn4Δ::HygMX</i>                            | This study |
| YTD 575     | YTD 559       | <i>trm8Δ trm4Δ gcn2Δ met22Δ::HygMX</i>         | This study |
| YTD 576     | YTD 571       | <i>tan1Δ::BleMX gcn2Δ::KanMX</i>               | This study |
| YTD 577     | YTD 572       | <i>tan1Δ::BleMX trm44Δ::natMX gcn2Δ::KanMX</i> | This study |

### References

- Alexandrov A, Chernyakov I, Gu W, Hiley SL, Hughes TR, Grayhack EJ, et al. Rapid tRNA decay can result from lack of nonessential modifications. *Mol Cell*. 2006;21(1):87-96.
- Kotelawala L, Grayhack EJ, Phizicky EM. Identification of yeast tRNA Um(44) 2'-O-methyltransferase (Trm44) and demonstration of a Trm44 role in sustaining levels of specific tRNA(Ser) species. *RNA*. 2008;14(1):158-69.
