# Supplementary material for: Hypomodified tRNA in evolutionarily distant yeasts can trigger rapid tRNA decay to activate the general amino acid control response, but with different consequences
Source: PubMed Central journal article supplement (PMC7473580; doi:10.1371/journal.pgen.1008893), 2020-08-25
Supplement: pgen.1008893.s027.pdf [file pgen.1008893.s027.pdf]

**S4 Table. Plasmids used in this study**

| Plasmid   | Parent   | Description                                                   | Source     |
|-----------|----------|---------------------------------------------------------------|------------|
| pREP3X    |          | <i>LEU2 P<sub>nmt1</sub></i>                                  | [1]        |
| pREP41X   |          | <i>LEU2 P<sub>nmt1*</sub></i>                                 | [1]        |
| pREP81X   |          | <i>LEU2 P<sub>nmt1**</sub></i>                                | [1]        |
| AB 553-1  | pREP3X   | <i>LEU2</i> with a NotI between PstI and P <sub>nmt1</sub>    | This study |
| ETD 67-1  | AB 553-1 | <i>LEU2 P<sub>trm8 trm8*</sub></i>                            | This study |
| ETD 70-1  | AB 553-1 | <i>LEU2 SPATR<sub>NAPRO.05</sub> SPBTR<sub>NAPRO.05</sub></i> | This study |
| ETD 113-1 | AB 553-1 | <i>LEU2 SPATR<sub>NATYR.01</sub></i>                          | This study |
| ETD 115-1 | AB 553-1 | <i>LEU2 SPATR<sub>NATYR.01</sub> SPBTR<sub>NAPRO.05</sub></i> | This study |
| ETD 104-1 | AB 553-1 | <i>LEU2 P<sub>dhp1 dhp1*</sub></i>                            | This study |
| ETD 109-1 | pREP81X  | <i>LEU2 P<sub>nmt1***</sub> gcn2+</i>                         | This study |
| ETD 119-1 | pREP41X  | <i>LEU2 P<sub>nmt1**</sub> tif221+</i>                        | This study |
| ETD 126   | EIC-17   | tV(AAC)E2 URA3 2u                                             | [2]        |

### References

1. Forsburg SL. Comparison of *Schizosaccharomyces pombe* expression systems. *Nucleic Acids Res.* 1993;21(12):2955-6.
2. Chernyakov I, Whipple JM, Kotelawala L, Grayhack EJ, Phizicky EM. Degradation of several hypomodified mature tRNA species in *Saccharomyces cerevisiae* is mediated by Met22 and the 5'-3' exonucleases Rat1 and Xrn1. *Genes Dev.* 2008;22(10):1369-80.
