# Supplementary material for: Hypomodified tRNA in evolutionarily distant yeasts can trigger rapid tRNA decay to activate the general amino acid control response, but with different consequences
Source: PubMed Central journal article supplement (PMC7473580; doi:10.1371/journal.pgen.1008893), 2020-08-25
Supplement: pgen.1008893.s028.pdf [file pgen.1008893.s028.pdf]

**S5 Table. Oligomers used for northern analysis**

| Name                   | Target RNA <sup>a</sup> | Probe (5'-3') | Sequence                       |
|------------------------|-------------------------|---------------|--------------------------------|
| TDZ 114                | tV(AAC)                 | 73-54         | TGATCGTGCCAAGACTCGAA           |
| TDZ 115                | tMi(CAU)                | 73-55         | TTGCGCGGCCAGGTTTCGA            |
| TDZ 123                | tMe(CAU)                | 20-1          | ACCGACTGAGCTACAGAAGC           |
| TDZ 124                | tK(CUU)                 | 73-55         | CTCCCAAGGCGAGACTCGA            |
| TDZ 125                | tK(UUU)                 | 73-54         | CTCCCACTGCGAGATTCGAA           |
| TDZ 126                | tP(AGG)                 | 72-53         | GGGCTGTTGTGGGAATCGAA           |
| TDZ 128                | tY(GUA)                 | 73-52         | TCTCCTGAGCCAGAATCGAACT         |
| TDZ 129                | tV(CAC)                 | 23-1          | TCATACCACTAGAACACGGGACT        |
| TDZ 130                | tV(UAC)                 | 73-52         | TGCATCTACCAGGGATCGAAC          |
| TDZ 131                | tI(AAU)                 | 73-55         | TGGTCACAGCCGGGTTTCGA           |
| TDZ 132                | tN(GUU)                 | 73-57         | CGGTCAGGGAGGGACTC              |
| TDZ 137                | tA(AGC)                 | 73-50         | GGACAAGCCAGAACTCGAATCT         |
| TDZ 138                | tA(CGC)                 | 73-54         | TGGAGATGCCGGGAATCGAA           |
| TDZ 140                | tT(AGU)                 | 72-54         | GCTCCAGCAGTGACTIONCGAA         |
| TDZ 141                | tT(CGU)                 | 54-34         | AACTGGACCTCCTGTTTACG           |
| TDZ 143                | tP(UGG)                 | 27-4          | AGTATGCTACCACTACACCACGAA       |
| TDZ 155                | 5.8S rRNA               | 60-37         | GCTGCGTTCTTCATCGATGCG          |
| TDZ 177                | tP(AGG)                 | 27-5          | GGTATCATACCACTAGACCAAAC        |
| TDZ 182                | tR(CCU)                 | 39-17         | CTCGTTAGGAATGAGATGCGCTA        |
| TDZ 184                | tC(GCA)                 | 22-1          | CTAACCACTGAGCTATGACCCC         |
| TDZ 185                | tW(CCA)                 | 22-1          | CTACCAACTGAGTTAAGGGGCC         |
| TDZ 186                | tA(UGC)                 | 73-54         | TGGACACGCTGGGGATTGAA           |
| TDZ 364                | 5S rRNA                 | 58-33         | TAAGTGCAGTGATCGGACGGG          |
| TDZ 395                | pre-tY(GUA):2           | In10-26       | ATCGTTTTAATTACAGCCGGATG        |
| TDZ 396                | pre-tY(GUA):1-1, 1-2    | 41-In-29      | CGGTATCTTTATAATTACAGCCGG       |
| TDZ 397                | pre-tY(GUA):1-3         | 41-In-29      | CGGTATCATCGAAATTACAGCCGG       |
| LH 735                 | tL(UAA)                 | 73-54         | TGCGGCCAGAGAGGTTTCGAA          |
| LH 737                 | tG(GCC)                 | 73-53         | TGCTTTGGCCGGGAATCGAAC          |
| <i>Val(CCA)</i>        | <i>tV(AAC)</i>          | <i>76-60</i>  | <i>TGGTGATTTTCGCCAGGA</i>      |
| <i>tRNAPhe</i> loop    | <i>tF(GAA)</i>          | <i>64-45</i>  | <i>TGTGGATCGAACACAGGACC</i>    |
| <i>TrpP1</i>           | <i>tW(CCA)</i>          | <i>33-15</i>  | <i>AGT CGA AAG CTC TAC CAT</i> |
| 5S                     | 5S                      | 20-1          | TGGTAGATATGGCCGCAACC           |
| <i>5'-tRNALys(UUU)</i> | <i>tK(UUU)</i>          | <i>18-1</i>   | <i>CAACTGAGCTAACAAGGA</i>      |
| <i>LeuCAAP1</i>        | <i>tL(CAA)</i>          | <i>62-e3</i>  | <i>AGATTCGAACTCTTGATCTT</i>    |
| <i>5'-tRNAArg(UCU)</i> | <i>tR(UCU)</i>          | <i>24-5</i>   | <i>CGTTGCCATTACGCCACGC</i>     |
| TDZ 415                | pre-tV(AAC)             | +9-60         | AAAAAATGATTTTCGCCAGG           |

<sup>a</sup>Note that *S. cerevisiae* oligomers are indicated in italics
