# Supplementary material for: Hypomodified tRNA in evolutionarily distant yeasts can trigger rapid tRNA decay to activate the general amino acid control response, but with different consequences
Source: PubMed Central journal article supplement (PMC7473580; doi:10.1371/journal.pgen.1008893), 2020-08-25
Supplement: pgen.1008893.s029.pdf [file pgen.1008893.s029.pdf]

**S6 Table. Oligomers used for tRNA purifications**

| Name    | Target RNA | Probe (5'-3') | Sequence                          |
|---------|------------|---------------|-----------------------------------|
| TDZ 342 | tF(GAA)    | 76-53         | biotin-TGGTGTACACAAACCGGGATCGAAC  |
| TDZ 358 | tY(GUA)    | 76-64         | biotin-TGGTCTCCTGAGCCAGAATCGAACTA |
| TDZ 359 | tP(AGG)    | 76-54         | biotin-TGGGGGCTGTTGTGGGAATCGAA    |
